# Supplementary material for: PDCD4 regulates axonal growth by translational repression of neurite growth-related genes and is modulated during nerve injury responses
Source: PubMed Central journal article supplement (PMC7566564; doi:10.1261/rna.075424.120), 2020-11

**A**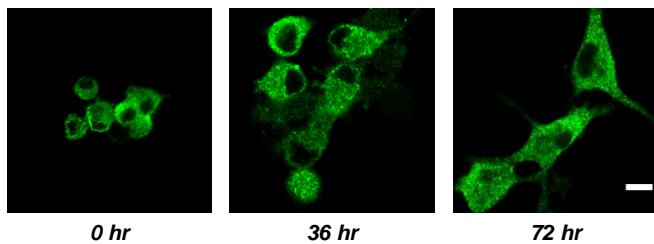**B**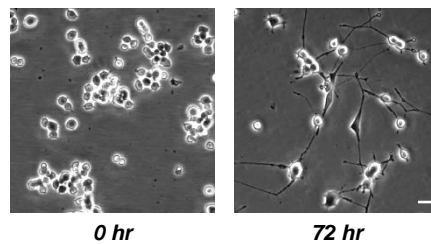**C**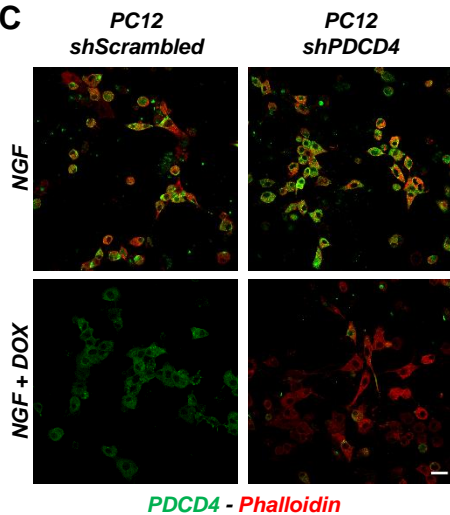**D**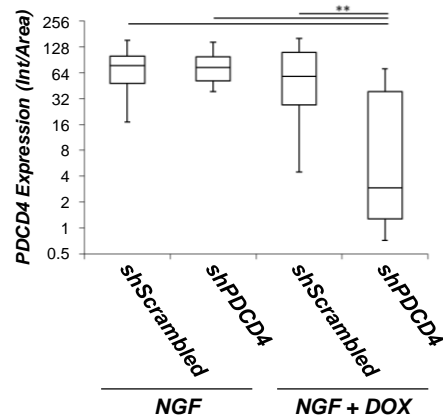**E**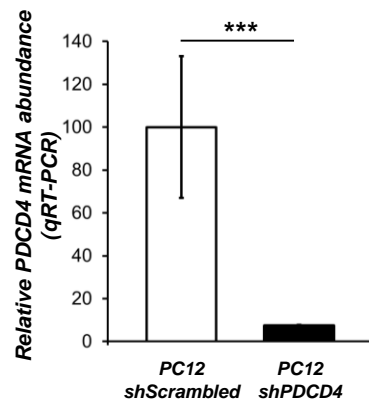**F**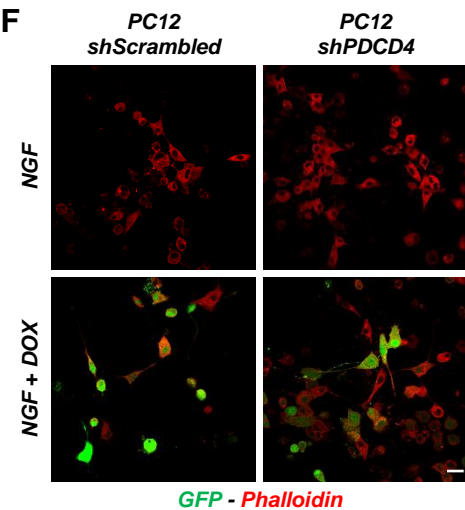**G**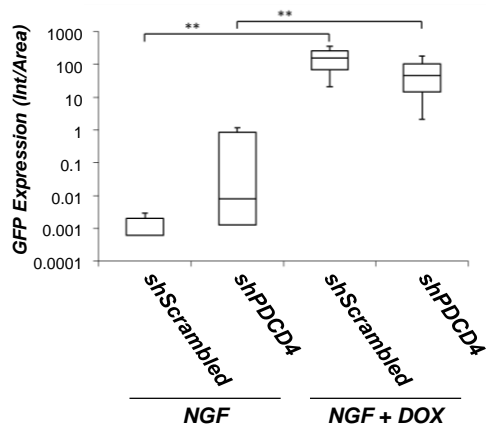

Supplement: supp_075424.120_Supplemental_Fig_S2.pdf [file supp_075424.120_Supplemental_Fig_S2.pdf]
