# Supplementary material for: PDCD4 regulates axonal growth by translational repression of neurite growth-related genes and is modulated during nerve injury responses
Source: PubMed Central journal article supplement (PMC7566564; doi:10.1261/rna.075424.120), 2020-11

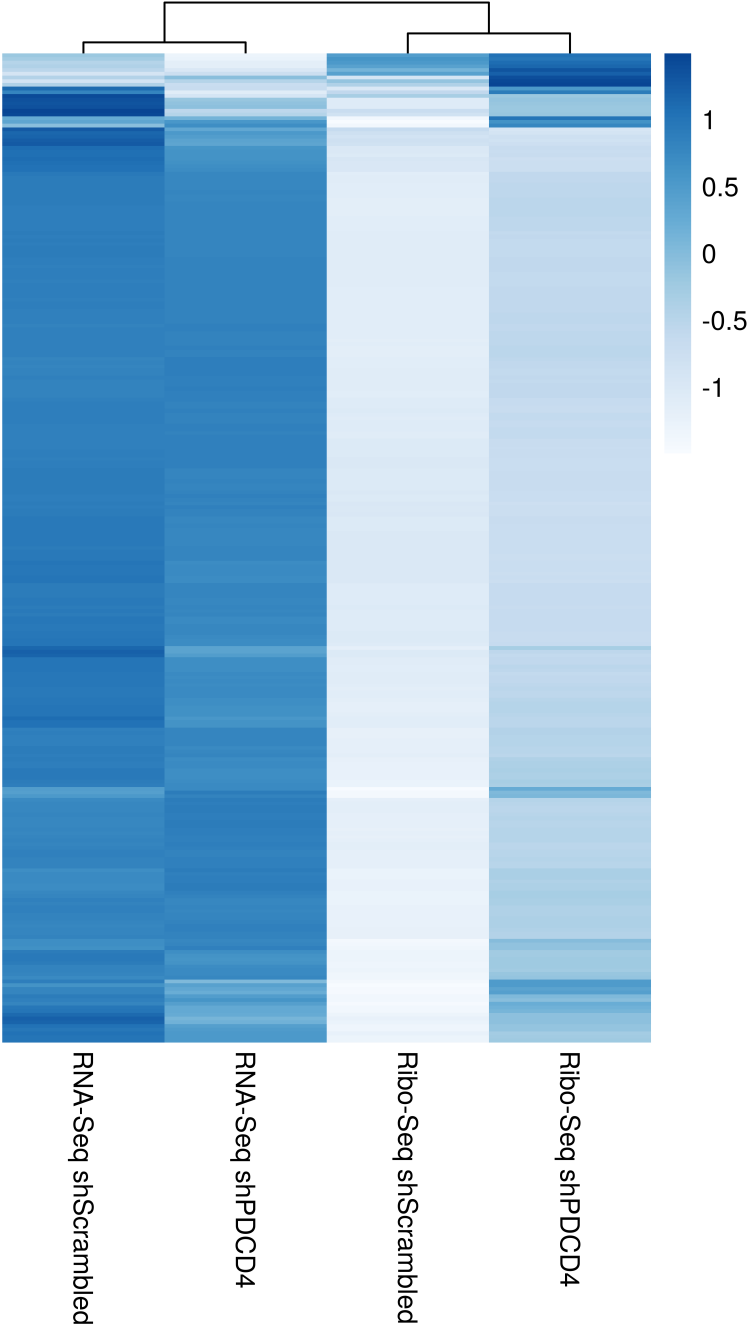

Supplement: supp_075424.120_Supplemental_Fig_S4.pdf [file supp_075424.120_Supplemental_Fig_S4.pdf]
