# Supplementary material for: PDCD4 regulates axonal growth by translational repression of neurite growth-related genes and is modulated during nerve injury responses
Source: PubMed Central journal article supplement (PMC7566564; doi:10.1261/rna.075424.120), 2020-11
Supplement: supp_075424.120_Supplemental_Fig_S8.pdf [file supp_075424.120_Supplemental_Fig_S8.pdf]

**A**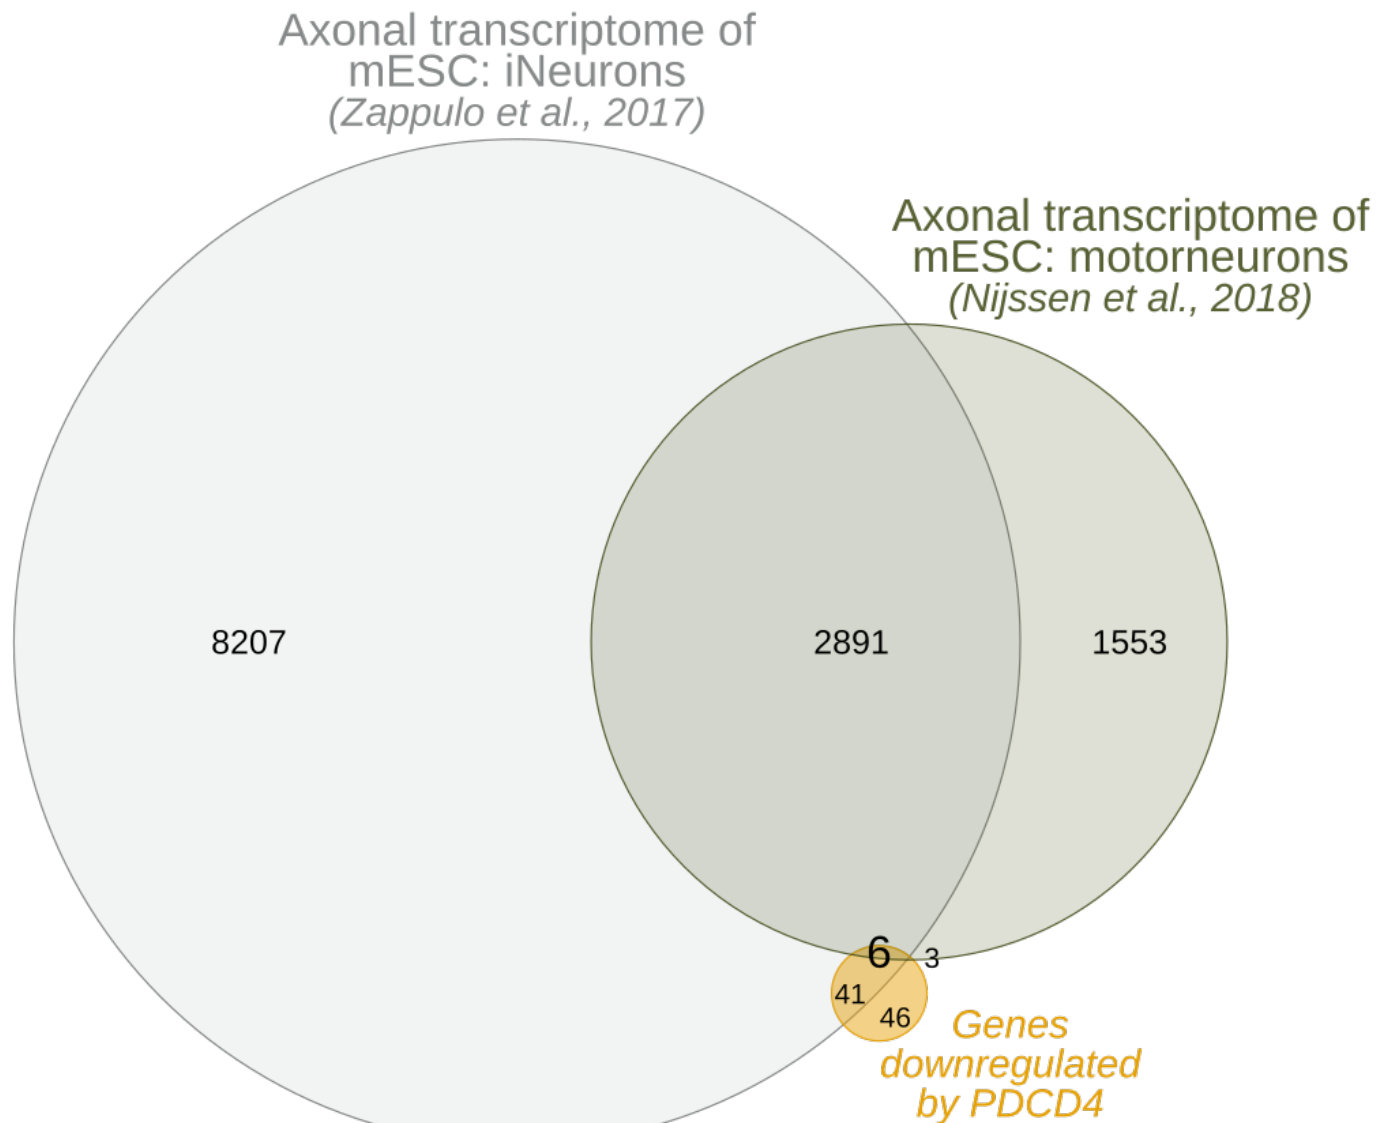**B**

| Neuron           | Total genes | In common with genes downregulated by PDCD4 | Reference            |
|------------------|-------------|---------------------------------------------|----------------------|
|                  |             | All (EASE Score)                            |                      |
| mESC:iNerons     | 11145       | 47 (0.2263)                                 | Zappulo et al., 2017 |
| mESC:motorneuron | 4453        | 9 (0.1118)                                  | Nijssen et al., 2018 |
