# Supplementary material for: PDCD4 regulates axonal growth by translational repression of neurite growth-related genes and is modulated during nerve injury responses
Source: RNA. 2020 Nov;26(11):1637–53. doi: 10.1261/rna.075424.120 (PMC7566564; doi:10.1261/rna.075424.120)
Supplement: Supplemental Material [file supp_075424.120_Supplemental_Table_S1.xlsx]

## Sheet: TableS1
		TRANSCRIPTOMES		TRANSLATOMES
		paired-end reads	total mapped	single-end reads	rRNA reads	mapped reads
shScrambled	1	23475202	15287348	44596401	38263225	3622572
	2	24485454	1.55648e+07	43251662	20191932	7139593
shPDCD4	1	22595342	1.48144e+07	50260297	41745517	6127848
	2	24709504	1.57669e+07	45023803	23325373	4277358
