# Supplementary material for: PDCD4 regulates axonal growth by translational repression of neurite growth-related genes and is modulated during nerve injury responses
Source: RNA. 2020 Nov;26(11):1637–53. doi: 10.1261/rna.075424.120 (PMC7566564; doi:10.1261/rna.075424.120)
Supplement: Supplemental Material [file supp_075424.120_Supplemental_Table_S2.xlsx]

## Sheet: TableS2
GenID	Average RPKM RNASeq shScram	Average RPKM RNASeq shPDCD4	Average RPKM RiboSeq shScram	Average RPKM RiboSeq shPDCD4	log2FC Transl Eff	p value
Abhd1	284.61	226.915	56.5913	92.6985	1.04445	0.0349007
Abhd14a	289.182	245.569	16.897	39.1336	1.44171	0.00846054
Acadsb	92.8198	101.04	5.66409	16.123	1.36944	0.0128707
Acot9	1138.75	1036.97	140.784	228.142	0.833028	0.0467869
Acsf2	242.977	187.636	15.7452	24.1219	0.978504	0.0255016
Acyp1	999.696	853.216	25.4157	42.5742	0.978715	0.0163946
Adal	70.8525	85.5405	9.86836	23.5052	1.00012	0.0385781
Aldh6a1	171.04	167.206	14.5612	26.2494	0.884253	0.0253353
Amigo2	36.9272	18.9792	6.07168	8.96289	1.52121	0.00360743
Anapc10	585.644	538.396	83.0297	170.2	1.15458	0.0209843
Ankrd1	268.084	121.964	7.2912	12.0551	1.87286	0.0264287
Anxa4	1336.99	1173.79	216.747	356.301	0.904789	0.0461209
Aoc3	19.0257	11.4839	5.64794	10.2891	1.60219	0.00273741
Apoo	703.461	571.441	55.6681	92.5596	1.02652	0.00861378
Arsk	107.153	85.0391	17.5889	36.5728	1.40866	0.00805672
Asah1	1803.04	1947.72	439.906	1053.83	1.14904	0.000513059
Atp1b1	6144.99	5119.97	684.1	958.015	0.749694	0.049655
B3galt6	182.437	167.165	54.7125	92.0496	0.875614	0.0230448
B4galt1	210.095	191.61	43.1333	82.8095	1.07474	0.00387366
Babam2	701.086	644.546	65.7839	123.712	1.03571	0.0276635
Bag2	456.201	371.812	47.2839	68.6293	0.831298	0.0400701
Bbs10	195.344	159.792	52.463	99.3762	1.2114	0.00100476
Bloc1s6	383.125	321.805	33.197	53.2024	0.937321	0.0149088
Bpifc	164.03	132.119	80.4384	124.903	0.947237	0.0194716
C1qtnf2	184.343	164.211	56.0675	172.734	1.79742	4.8495e-05
Ca5a	108.395	96.8583	9.09764	18.6599	1.18773	0.0251977
Cacybp	2722.53	2367.88	80.5227	140.176	1.00306	0.00599367
Cadm1	11845	13426	1562.92	3240.29	0.871541	0.0169804
Casp7	396.886	384.767	22.5443	38.0128	0.806612	0.0451953
Catsperd	32.7431	28.0636	1.51673	7.41982	2.40644	5.19469e-05
Catsperg	12.8527	5.20913	1.73578	4.53954	2.78525	4.4214e-05
Cbr3	748.138	584.013	49.8653	74.1472	0.931776	0.0373748
Cbx3	937.602	1032.49	216.052	423.824	0.833696	0.0204673
Ccdc163	111.304	73.9858	8.87166	16.2906	1.50982	0.00295735
Ccdc175	12.8959	8.94949	2.47477	9.33503	2.48808	0.000366078
Ccdc39	118.644	123.019	6.77108	14.0899	1.01687	0.0178073
Ccl27	115.233	63.1052	10.0285	15.1329	1.48793	0.019564
Ccl7	307.527	405.872	11.3912	34.0629	1.20965	0.0145933
Cd44	26.6667	15.426	11.1442	15.5284	1.29262	0.0130591
Cdk2ap2	1195.45	1027.35	27.3919	44.021	0.896699	0.0419876
Cdkl3	70.1669	83.454	4.76978	11.9039	1.14269	0.036186
Cdkn2c	365.87	338.38	26.1666	54.2472	1.17874	0.00287691
Cenpf	23.5681	12.5672	5.5389	5.77042	0.96238	0.0336538
Cenpk	111.716	86.1729	45.0728	81.7262	1.23663	0.0147231
Cenpq	68.4159	52.2744	4.92803	10.347	1.52911	0.0132636
Cep55	47.228	21.2016	4.48293	10.6979	2.43623	4.46116e-06
Cetn4	104.57	74.5453	27.2847	83.6165	2.1031	2.14629e-05
Cfap77	13.9804	22.4536	2.06427	9.39095	1.54235	0.0380771
Chmp1b	1584.26	1436.95	260.23	438.257	0.893318	0.0487204
Churc1	1144.33	1308.96	58.2411	131.543	0.990954	0.0169229
Cib1	750.186	575.152	158.83	261.475	1.106	0.0193004
Cir1	1393.48	1410.27	99.9302	183.353	0.857557	0.0161489
Cldn6	42.8208	29.1248	3.25395	7.64104	1.8182	0.00675416
Cldnd1	2152.63	2067.64	313.379	518.358	0.78319	0.0412856
Cln3	886.302	736.686	36.6804	63.6004	1.06283	0.0220419
Clvs1	21.015	17.101	7.76371	13.1084	1.05467	0.0344551
Cnot10	432.569	410.62	58.6258	101.735	0.872467	0.0446376
Cox17	5437.79	5115.92	968.019	1789.68	0.974841	0.0319718
Cox6c	3690.22	3496.08	275.719	524.826	1.00352	0.00469742
Cpt2	256.056	183.401	16.9256	33.2797	1.45396	0.00223057
Crh	1047.18	787.625	61.1334	107.736	1.22771	0.00615519
Cryz	97.689	75.8668	8.89982	13.9024	1.03349	0.0423027
Ctf1	379.381	306.87	56.1242	81.5868	0.845499	0.0315445
Ctsb	18337.2	18779.6	2524.42	4264.73	0.721715	0.0464636
Cxxc4	47.5587	35.3879	14.7587	26.6278	1.28579	0.00181419
Cyp2c6v1	27.5829	18.869	9.49935	16.3064	1.30093	0.0298119
Dad1	4609.19	4326.23	162.62	313.263	1.03811	0.0176757
Daglb	226.845	228.311	27.0831	48.9183	0.847947	0.0463349
Dcun1d1	1406.11	1190.89	142.206	203.733	0.759689	0.0429846
Dmd	26.3098	18.7611	5.39236	7.0788	0.88183	0.0260254
Dnajc12	366.463	399.786	78.521	157.88	0.887925	0.0179968
Dpm3	1236.47	1124.6	139.157	260.038	1.05078	0.0366723
Dram1	95.421	70.7996	8.24756	11.9276	0.977823	0.0371374
Drc3	37.3391	25.5105	5.80017	13.9067	1.80256	0.00458959
Dtd2	291.576	284.1	12.4183	44.6582	1.84493	0.000562013
Dusp14	10.6738	9.8634	1.50173	3.96778	1.52188	0.0300225
Dynll1	5750.85	4696.74	256.391	362.669	0.791206	0.0287819
E2f7	28.5849	21.765	3.06747	5.66567	1.24272	0.0296915
Eif1b	1756.34	1665.65	128.974	268.894	1.14149	0.00194876
Eif2b2	1367.57	1168.08	89.338	173.908	1.18588	0.00699548
Elavl4	929.359	745.582	106.713	162.604	0.927062	0.00729293
Emb	5366.7	4748.09	493.193	852.343	0.966649	0.0215881
Emc2	1260.17	1207.63	135.868	237.846	0.871655	0.0335039
Eri2	202.403	194.579	14.7817	33.1394	1.21883	0.00168956
Erp44	1035.05	1061.79	67.1206	143.416	1.05492	0.0279442
Exd1	17.245	10.9667	27.4309	43.3467	1.33993	0.0113425
F8a1	1447.43	1414.66	100.991	168.393	0.770093	0.0334462
Fbxo16	181.433	163.357	7.32176	17.5558	1.41468	0.00497079
Fbxo8	1417.85	1306.04	60.2224	116.938	1.07835	0.0136695
Fbxw9	351.366	392.769	25.9977	63.991	1.14727	0.00218085
Fibp	1063.11	928.027	102.121	177.613	0.992815	0.0409474
Fuz	209.397	235.057	65.7984	136.754	0.886488	0.0207325
Fxn	607.257	497.309	59.6322	109.822	1.18252	0.017018
Galt	421.294	389.013	12.3282	25.0209	1.13571	0.0125641
Gemin8	208.209	218.849	32.5289	71.9873	1.07348	0.0387768
Ggact	611.877	469.959	15.3476	26.2074	1.13173	0.00984883
Gng2	85.9115	72.2057	8.97468	16.0693	1.09006	0.00852527
Gng8	577.24	612.87	36.8942	78.9981	1.03523	0.0462381
Gpr176	6.26491	2.64312	1.48517	2.54738	2.13747	0.0148105
Gpr22	1871.43	1890.77	118.023	195.591	0.713859	0.0403963
Gpsm2	86.6263	88.6409	10.2453	21.7338	1.03756	0.0234459
Gramd2b	49.9665	41.5721	4.97431	9.02149	1.12005	0.0394762
Gstt1	403.62	397.516	17.8948	34.6206	0.983815	0.0334942
Hebp1	298.313	260.376	24.3467	51.8812	1.28332	0.023847
Hebp2	214.272	175.659	9.96454	19.6292	1.2602	0.00296269
Henmt1	55.3541	55.5649	4.46455	11.922	1.32363	0.0182954
Hes1	699.258	558.506	54.4691	86.7778	0.990431	0.0225914
Hmx2	133.257	178.134	7.00317	21.2828	1.16596	0.0180287
Hpcal1	345.1	405.877	7.49057	22.6031	1.35196	0.00256364
Hsd17b12	1357.1	1157.35	148.354	232.131	0.874687	0.012717
Hsf2	711.093	688.685	85.5684	160.448	0.953517	0.00766917
Id2	8367.51	6937.47	2554.97	3767.73	0.829828	0.0352288
Ifi27l2b	44514.4	33103.8	5866.54	8129.79	0.897705	0.0376667
Il6st	1422.13	1169.29	1921.6	3288.76	1.05776	0.00159682
Ing2	177.36	191.685	16.7469	43.0146	1.24303	0.0010294
Invs	50.4601	47.3656	6.34084	13.9569	1.23052	0.0218749
Irak2	24.9333	19.2726	2.68393	6.62503	1.71345	0.00819622
Itgb3bp	152.284	117.019	11.0648	30.0709	1.81093	0.000146507
Jund	5523.61	4931.51	447.999	707.153	0.821508	0.0169838
Kyat3	88.4355	51.3302	8.35602	22.3139	2.19422	2.19114e-05
Lnx1	33.116	41.1247	3.5952	9.86292	1.14865	0.0460995
LOC689959	796.873	934.951	89.6532	194.793	0.893999	0.0213352
LOC691995	27.3965	21.2552	5.68127	18.1233	2.03866	0.00156535
Lrrn4cl	9.46501	4.68921	17.0991	22.8794	1.47749	0.0460705
Lsm2	655.888	598.589	41.0976	83.2197	1.15549	0.0134276
Lsm5	339.506	446.222	10.39	36.1948	1.43371	0.00914882
Lsr	3037.47	2617.22	481.948	830.723	1.00009	0.0395883
Lyrm9	119.213	136.628	6.00908	18.6314	1.44038	0.0102304
Mab21l2	149.059	102.878	15.3419	19.8826	0.921715	0.0393228
Mad2l1	110.912	73.5759	15.4355	38.0107	1.88319	0.000395672
Mapre2	1395.75	1033.46	169.308	224.725	0.842012	0.0194648
Meaf6	362.949	389.752	23.5969	48.211	0.947434	0.0229607
Med18	190.56	187.395	16.1653	32.5449	1.05318	0.0165827
Med28	752.489	736.784	48.6736	124.38	1.38473	6.04407e-05
Med30	545.869	461.947	28.2936	68.5777	1.53886	0.000302813
Med31	853.442	858.985	26.3368	76.5046	1.51728	0.00269698
Mettl18	103.56	95.4579	13.9496	26.4995	1.03209	0.0384574
Mettl5	627.375	642.061	104.814	201.16	0.913539	0.0346743
Mgarp	424.629	416.059	40.3972	80.9872	1.03642	0.0245992
Mis12	532.973	489.393	48.6149	111.544	1.3208	0.00174169
Mis18bp1	51.878	48.3053	8.17297	18.2515	1.26697	0.00636878
Mob1b	208.989	225.657	41.193	82.8336	0.903434	0.0160366
Mrpl32	424.769	414.122	92.1695	174.043	0.948388	0.0471037
Mrpl41	1698.65	1649.59	149.049	295.218	1.02593	0.0449605
Mrps14	817.891	741.359	145.075	243.931	0.894598	0.0170198
Mrps36	919.881	700.482	14.5956	30.5126	1.47221	0.00225571
Mthfd1	651.633	555.725	174.173	302.271	1.027	0.0319575
Myh3	22.6321	16.8245	4.91755	7.48586	1.03228	0.0431551
Myod1	7.42889	3.36226	24.4185	48.5709	2.17875	0.0176392
Mzf1	28.1441	36.3707	3.92531	10.0699	1.01137	0.0442585
Nat1	37.8932	31.6514	7.00048	15.4985	1.41189	0.00298016
Ndc80	65.8442	36.0378	23.7507	34.3822	1.41779	0.0226592
Ndufa2	1339.64	1260.33	72.3974	162.482	1.24001	0.0192635
Nectin4	7.68264	4.52913	5.22115	7.98201	1.42736	0.0387864
Nek7	427.661	315.264	42.0808	57.3456	0.873156	0.0440454
Nfkb2	295.032	165.975	25.0471	30.5304	1.10905	0.0175564
Nmi	976.523	584.37	204.877	277.395	1.17768	0.0081072
Nmnat1	182.828	97.3578	31.6075	33.7497	1.00609	0.0195398
Nmnat3	123.977	141.477	19.2282	42.1324	0.932891	0.0282258
Nox1	11.9365	3.81641	3.47686	4.65218	2.03789	0.0138001
Nsg1	8506.18	7065.85	735.435	1030.05	0.753629	0.0351137
Nsmce3	675.67	706.581	219.64	470.327	1.0364	0.043472
Nsun6	67.5252	51.0193	10.3661	16.1397	1.0862	0.0471278
Nup107	374.555	296.23	85.7036	129.299	0.93201	0.0173592
Oas3	29.5902	11.9074	9.99586	21.927	2.45064	1.19843e-07
Ogt	1178.2	1134.3	178.639	310.987	0.854332	0.0197458
Ost4	2902.79	2804.5	50.1946	102.984	1.09188	0.0241128
Ovol2	59.0548	56.0881	8.24672	16.8668	1.14308	0.0469034
Pabpn1	2789.28	2817.28	103.364	176.134	0.753721	0.0331012
Paf1	2292.62	2192.24	537.375	1017.56	0.984617	0.035285
Pcyox1l	689.706	594.255	127.989	224.253	1.02233	0.00601659
Pfdn2	3690.8	2601.07	846.464	1241.46	1.0562	0.00696275
Pgrmc1	4765.2	3709.18	571.461	771.5	0.79546	0.0494947
Phactr1	64.5773	79.1205	15.4451	55.0323	1.55131	0.00277759
Phyhd1	135.001	107.652	3.95362	12.5334	1.91389	0.000835629
Pigbos1	141.021	133.049	32.5336	58.1599	0.922404	0.0465077
Pigp	631.8	726.764	14.4864	41.4132	1.31986	0.0106653
Pih1d1	458.95	371.5	27.6474	44.7948	0.987259	0.0305184
Pinx1	536.652	511.353	36.6494	73.0853	1.06083	0.0325663
Pip4p2	334.452	318.117	43.0085	68.3771	0.739619	0.0494405
Polr2d	1027.84	1030.33	48.0347	106.117	1.13825	0.00996178
Polr2l	2898.51	2645.91	2902.9	5068.01	0.935866	0.0474882
Prorp	330.731	280.841	22.6121	36.4951	0.929778	0.0234492
Psmd9	1241.9	1027.62	84.4265	127.776	0.873616	0.0347945
Ptcd2	189.85	205.298	16.9897	36.6909	1.01457	0.0390049
Ramac	1019.49	887.288	99.5868	153.096	0.821211	0.0377816
Rasgrp3	42.8085	43.1152	15.2346	28.0928	0.870463	0.034715
Rasl11b	9.93387	12.1483	7.64832	26.8285	1.51635	0.046354
Rbp4	119.848	135.681	11.6497	27.8302	1.09945	0.0456202
RGD1308706	309.931	274.103	9.84758	21.7043	1.32023	0.00420669
RGD1565784	763.933	711.097	42.7707	70.4227	0.815663	0.0379091
RGD735065	1532.1	1335	101.558	175.991	0.994736	0.0418304
Rnf125	243.674	194.647	64.9166	97.5597	0.914165	0.0399535
Rnf138	508.815	542.267	49.5409	87.6983	0.728171	0.0440671
Rpf2	1157.98	1091.46	123.665	207.476	0.830467	0.0465452
Rpl39	17007.6	16499.1	567.483	969.874	0.814252	0.0412713
Rpl39l	3881.01	3637.77	161.475	280.568	0.8854	0.036931
Rsu1	553.545	456.931	67.1763	103.605	0.906426	0.042498
Rtn1	254.705	135.78	10.336	14.5066	1.39038	0.0037368
Rtraf	2514.23	2607.02	271.781	555.695	0.978261	0.0384356
Scn7a	50.8705	39.1872	4.80154	7.264	0.969614	0.0357071
Scoc	1246.22	978.772	68.6232	116.287	1.10889	0.00209933
Scrn2	252.436	210.565	11.5182	23.572	1.28509	0.015421
Sdc4	537.383	468.813	211.079	326.283	0.826948	0.0249362
Sec14l4	13.0566	4.67168	6.10757	6.39831	1.55665	0.0497371
Sec61b	1931.03	1833.41	39.9776	72.9024	0.941751	0.0414414
Sec61g	4287.28	4523.85	353.709	704.217	0.913311	0.0228995
Sec62	3092.47	3013.74	249.064	446.497	0.877899	0.0227352
Selenoh	447.884	458.669	24.5756	66.1279	1.39507	0.00111564
Selenok	2770.58	2485.57	1252.93	1857.12	0.723588	0.0358345
Selenos	4942.48	4245.52	1062.67	2067.32	1.17963	0.000451767
Serpinb9	149.722	99.5496	15.7337	21.0025	1.00209	0.048901
Sesn1	255.985	201.775	28.394	45.7617	1.03195	0.0175377
Sfxn3	1354.52	1064.22	228.604	323.103	0.847135	0.0136628
Sh2d3c	106.949	146.588	1.36129	5.55521	1.67734	0.00262125
Sh3bgrl2	120.989	105.311	15.5448	27.7174	1.03034	0.0406543
Ska3	138.915	46.7206	10.5547	10.314	1.52854	0.0094989
Slbp	538.853	446.589	108.994	281.369	1.64085	3.45622e-05
Slc22a4	48.9442	42.4134	8.25321	16.8366	1.25143	0.0108344
Slc24a5	353.622	346.728	25.7114	57.654	1.1914	0.00315857
Slc26a1	38.1594	40.1519	0.957973	4.03645	2.15314	0.000374933
Slc30a6	456.329	355.466	119.629	174.091	0.901106	0.0411915
Slc35g2	25.2298	31.055	6.06966	17.9795	1.2839	0.0401757
Slfn4	344.053	72.4906	15.0614	9.38567	1.5552	0.000285045
Smarca2	97.3436	83.2741	14.5816	21.9461	0.816049	0.040846
Snrpc	1745.99	1607.78	66.1681	148.86	1.28676	0.00031286
Snx10	834.186	684.076	146.379	228.452	0.933352	0.00868759
Sox18	46.2324	51.0945	4.02469	12.7231	1.5513	0.00838962
Spsb2	655.958	525.471	78.4931	145.845	1.21987	0.01958
Srp14	2784.14	2737.13	528.317	929.92	0.840783	0.0397714
Srsf9	1315.41	597.014	115.134	99.3535	0.923999	0.0192187
Ssu72	1405.62	1241.98	217.464	366.745	0.935047	0.0490654
Stard3nl	461.677	349.317	38.076	68.9518	1.25878	0.00116328
Stk17b	128.827	115.807	15.5038	26.7051	0.936707	0.0393476
Stmn3	6577.39	6136.34	270.548	426.871	0.760176	0.042802
Styxl1	87.6258	98.2892	28.6771	102.295	1.67427	0.00118725
Tamm41	961.732	933.33	270.525	550.621	1.06946	0.0308092
Tardbp	1365.33	1400.25	265.38	575.645	1.08008	0.00143352
Tbx4	5.67142	2.33598	9.59348	15.1379	1.98512	0.0235007
Tfap4	343.682	302.584	52.5093	81.2919	0.815636	0.0400038
Tgif1	40.9083	26.2594	3.9817	17.0662	2.65802	1.59529e-05
Ticam2	26.9826	13.3908	11.7793	14.9314	1.359	0.00687102
Timeless	48.4761	56.1283	167.374	361.702	0.902683	0.0191063
Timm10b	367.755	484.033	599.363	1771.11	1.16725	0.00659353
Tma7	5246.11	5075.64	223.153	396.983	0.876651	0.0432007
Tmco1	2487.91	2035.88	309.144	422.911	0.741363	0.0458908
Tmem126a	331.411	307.084	15.2878	35.065	1.3031	0.0149096
Tmem170a	182.269	172.432	29.0816	60.26	1.1326	0.00437255
Tmem50a	3449.62	3007.12	393.664	710.254	1.05109	0.0245223
Tmem59l	1282.73	1151.13	127.183	249.915	1.13095	0.0163261
Tmsb4x	3595.49	2610.35	132.721	327.752	1.7719	0.0266633
Tnik	4.5498	7.70591	1.70366	8.27183	1.49756	0.0222983
Trappc2b	325.326	315.733	25.1946	54.3969	1.15118	0.016079
Trim45	72.9656	76.4545	2.15556	7.22476	1.65474	0.00335213
Trim6	33.3055	31.134	14.0891	49.0038	1.90632	0.000270752
Tsen34	1126.97	1074.52	132.397	226.861	0.847843	0.0314497
Tsen34l1	1234.19	1148.85	134.577	239.662	0.93583	0.0223432
Tspan7	2582.72	2246.62	277.365	451.979	0.905422	0.0261518
Txndc12	1136.31	966.924	64.2087	110.934	1.02415	0.017502
Txndc9	1767.83	1497.19	159.063	265.021	0.978	0.00996864
Ube2c	221.847	155.404	16.6944	26.7684	1.231	0.0264996
Utp11	867.932	829.099	55.9458	118.542	1.15165	0.00150724
Wwtr1	28.2598	18.5769	8.92967	23.1702	1.97654	0.0123012
Xrcc4	269.287	199.097	30.3815	41.6192	0.897365	0.040606
Yipf1	291.902	308.256	15.0574	30.4057	0.93902	0.0358859
Zbtb1	381.724	318.789	113.292	155.416	0.71603	0.0481066
Zfp689	213.239	203.988	11.2816	22.9037	1.09044	0.0123802
